# Supplementary material
Source: PubMed Central journal article supplement (PMC7334066)
Supplement: NIHMS1582582-supplement-1.pdf [file NIHMS1582582-supplement-1.pdf]

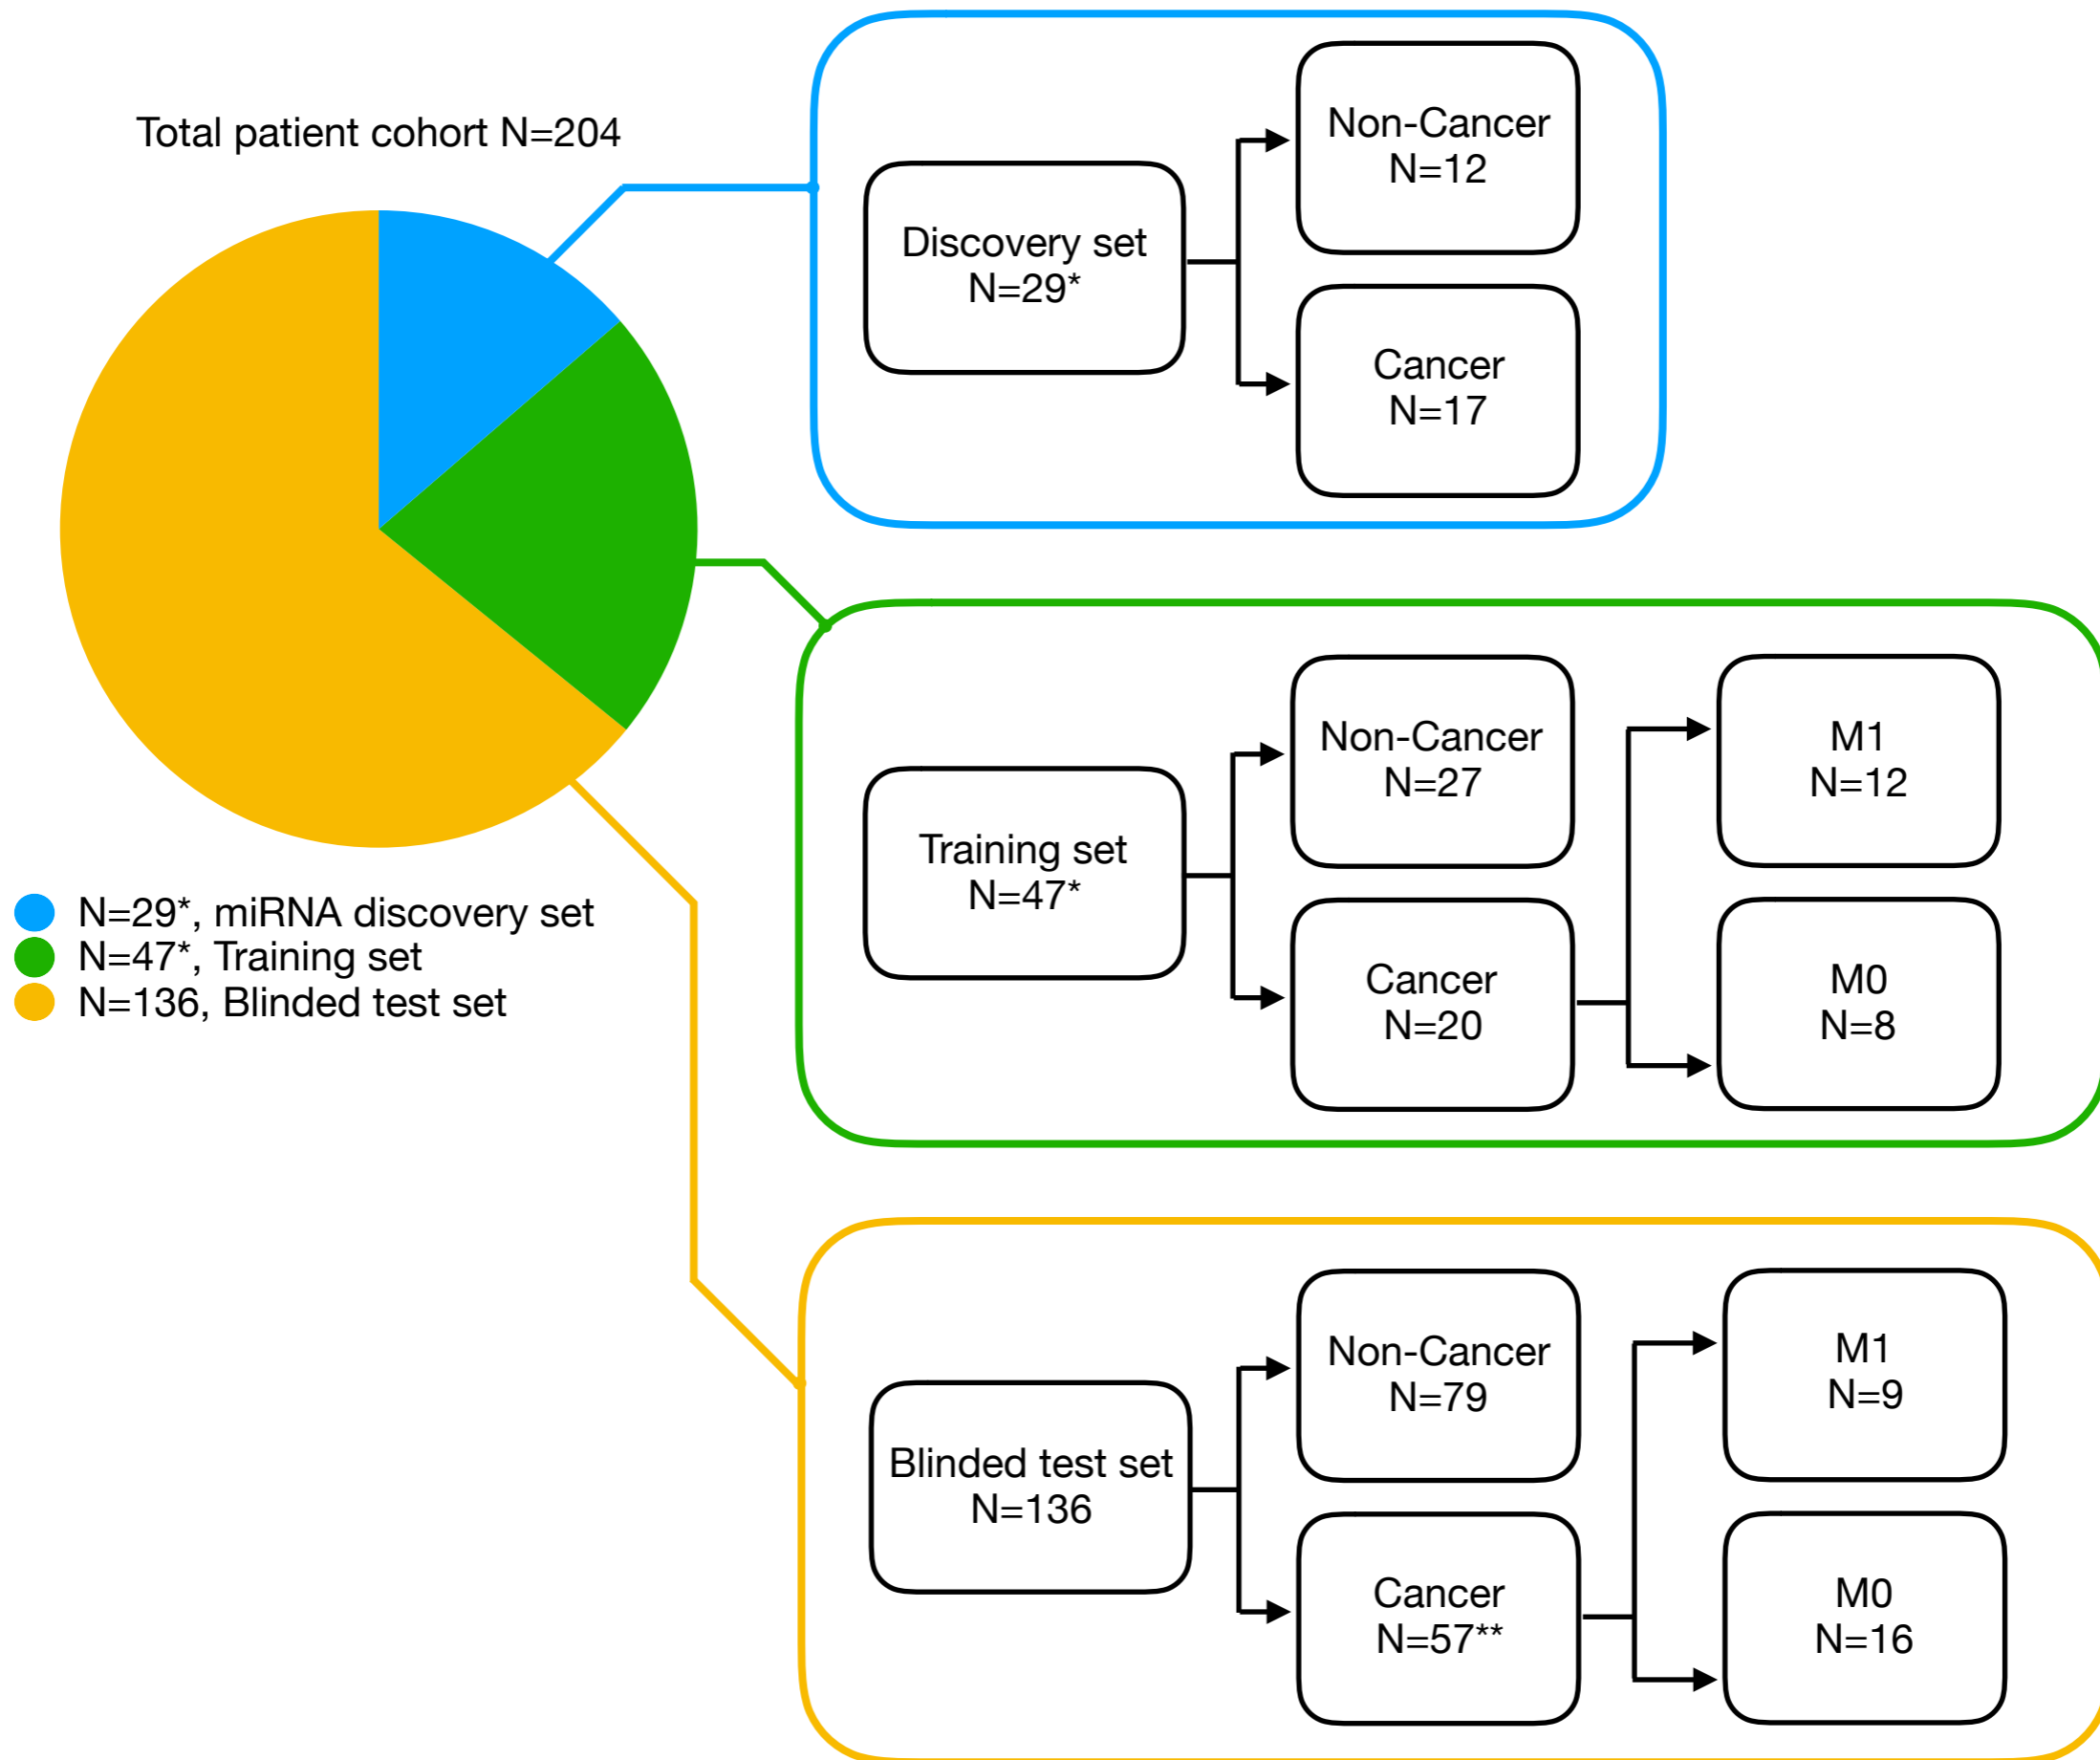

**Figure S1.** Sample cohort of this study, which included 204 subjects in total. Workflow shows patient cohorts involved in each classification. \* indicated 8 patients repeated in the discovery set and the training set. \*\* indicated 32 locally advanced patients that were not used in the occult metastases detection as training set did not have locally advanced PDAC patients.
