# Supplementary material
Source: PubMed Central journal article supplement (PMC7334066)
Supplement: NIHMS1582582-supplement-2.pdf [file NIHMS1582582-supplement-2.pdf]

# Figure S2

**A**

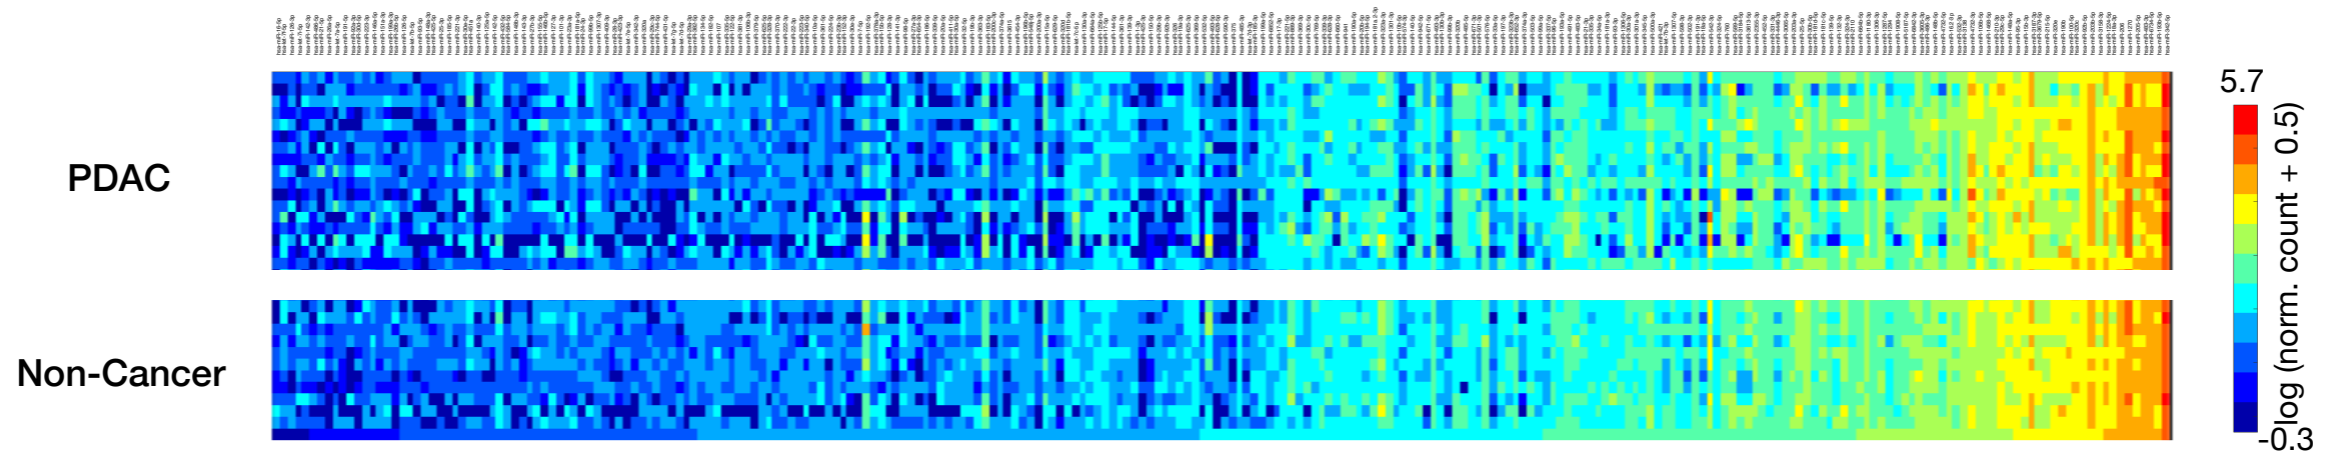

**B**

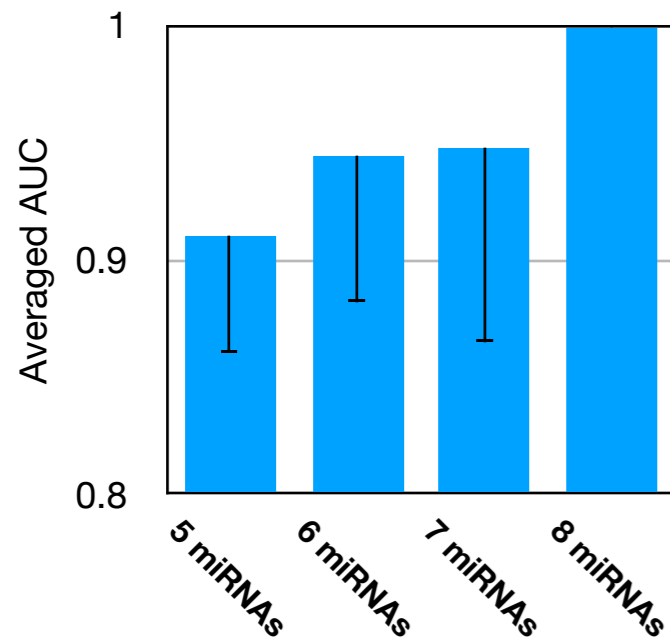

**C**

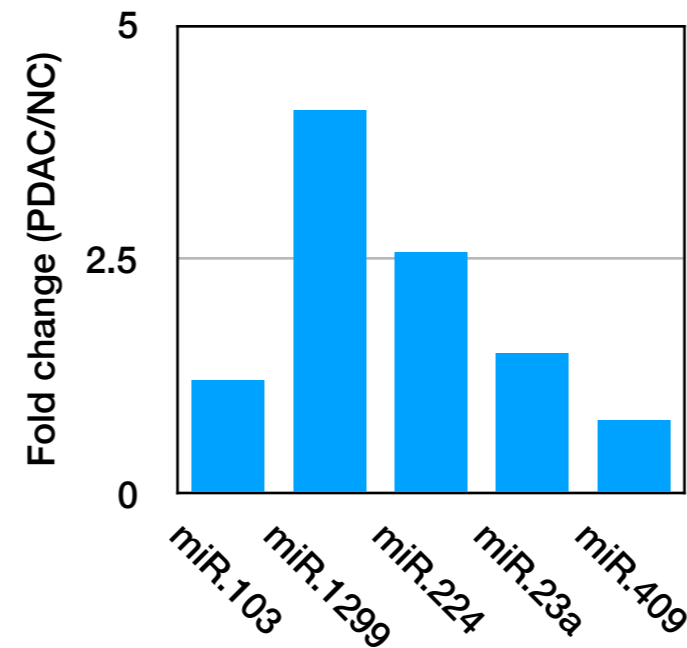

**D**

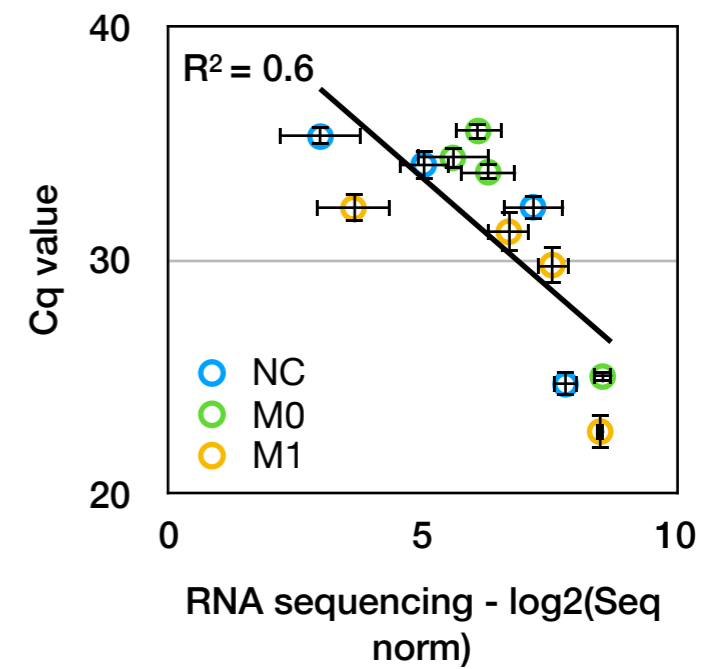

| miRNA candidates for PDAC diagnosis |            |             |             |
|-------------------------------------|------------|-------------|-------------|
| miR.103b                            | miR.23a.3p | miR.1299    | miR.409.3p  |
| miR.224.5p                          | miR.432.5p | miR.4782.5p | miR.4772.3p |

**Figure S2.** miRNA sequencing to discover miRNA biomarkers to discern PDAC from non-cancer. (A) Raw miRNA sequencing data from 6 healthy controls, 6 non-cancer disease controls, 5 M0 PDAC patients, and 12 M1 PDAC patients. (B) 8 potential miRNA candidates were selected using least absolute shrinkage and selection operator (LASSO) for cancer versus non-cancer, achieving AUC=1 within discovery cohort. (C) We selected 5 out of 8 miRNA candidates based on their abundance as detected by qPCR (Cq < 40) and show the average fold changes of these 5 miRNAs between patient groups. (D) We validated these miRNAs by calculating the correlation coefficient between their qPCR data and the miRNA sequencing data. The overall  $R^2 = 0.6$
