# Supplementary material
Source: PubMed Central journal article supplement (PMC7334066)
Supplement: NIHMS1582582-supplement-3.pdf [file NIHMS1582582-supplement-3.pdf]

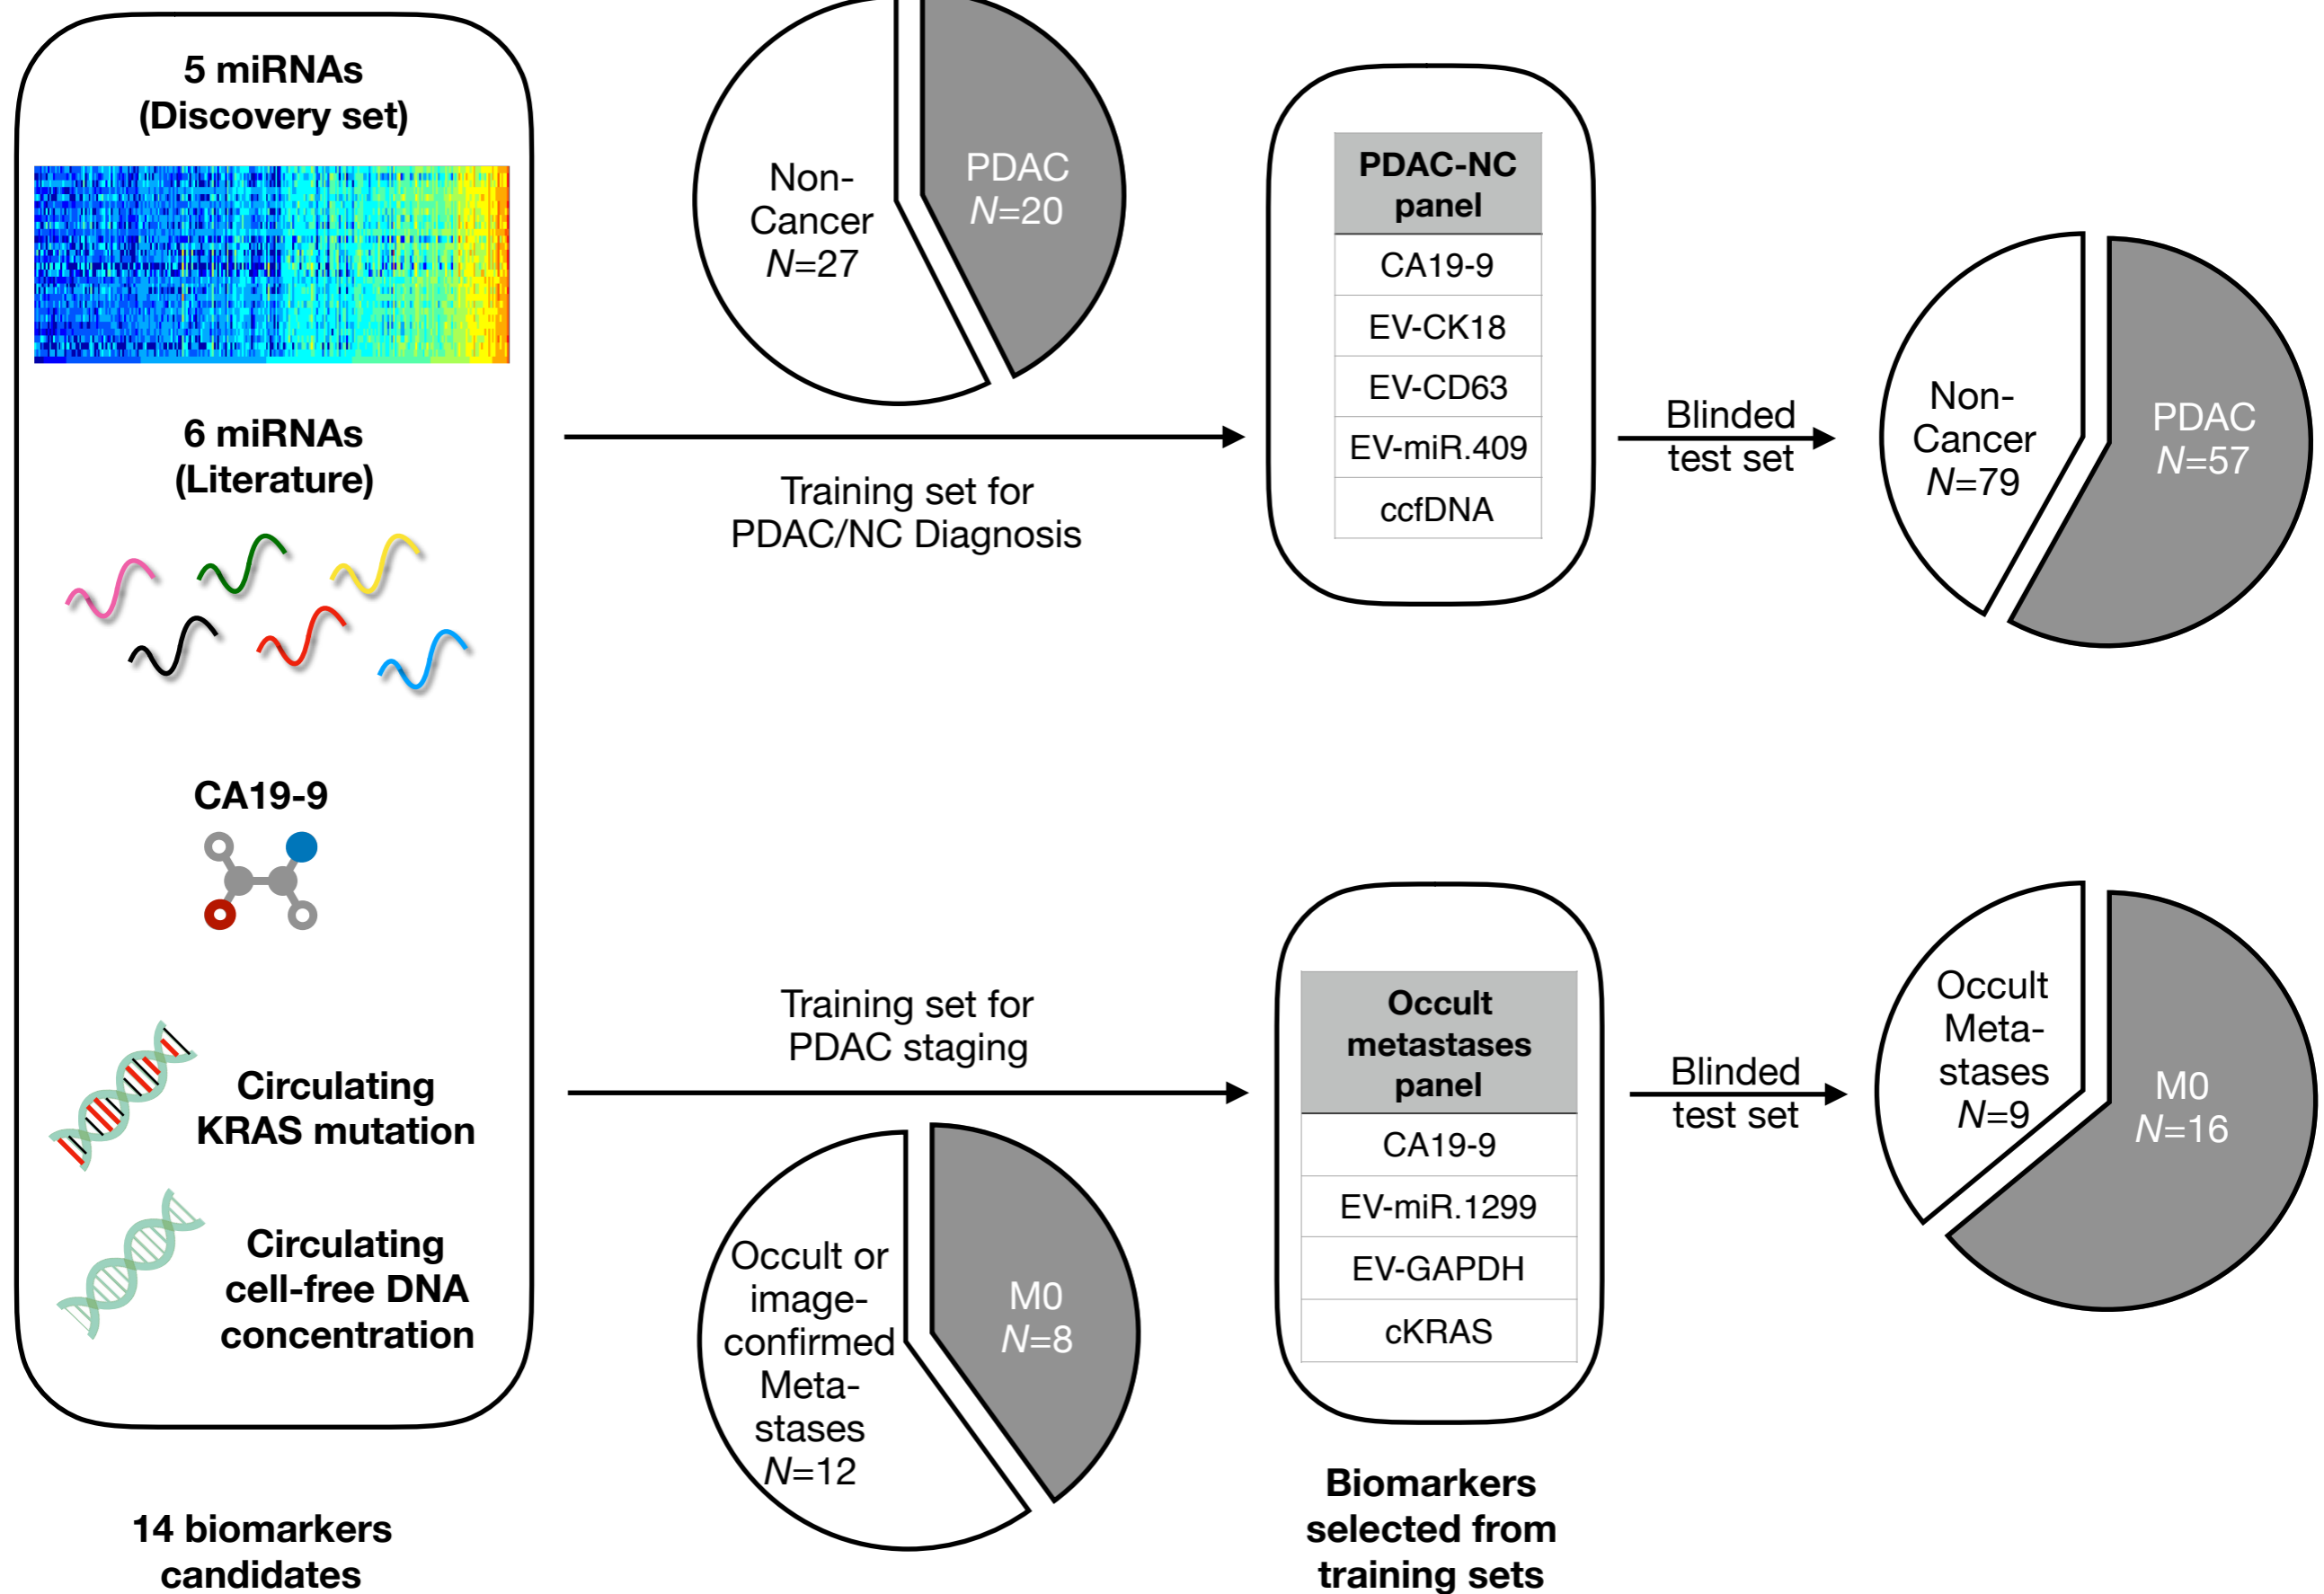

**Figure S3.** Multi-analyte panel generation procedure of PDAC/NC diagnosis and occult metastases detection
