# Supplementary material
Source: PubMed Central journal article supplement (PMC7334066)
Supplement: NIHMS1582582-supplement-4.pdf [file NIHMS1582582-supplement-4.pdf]

# Figure S4

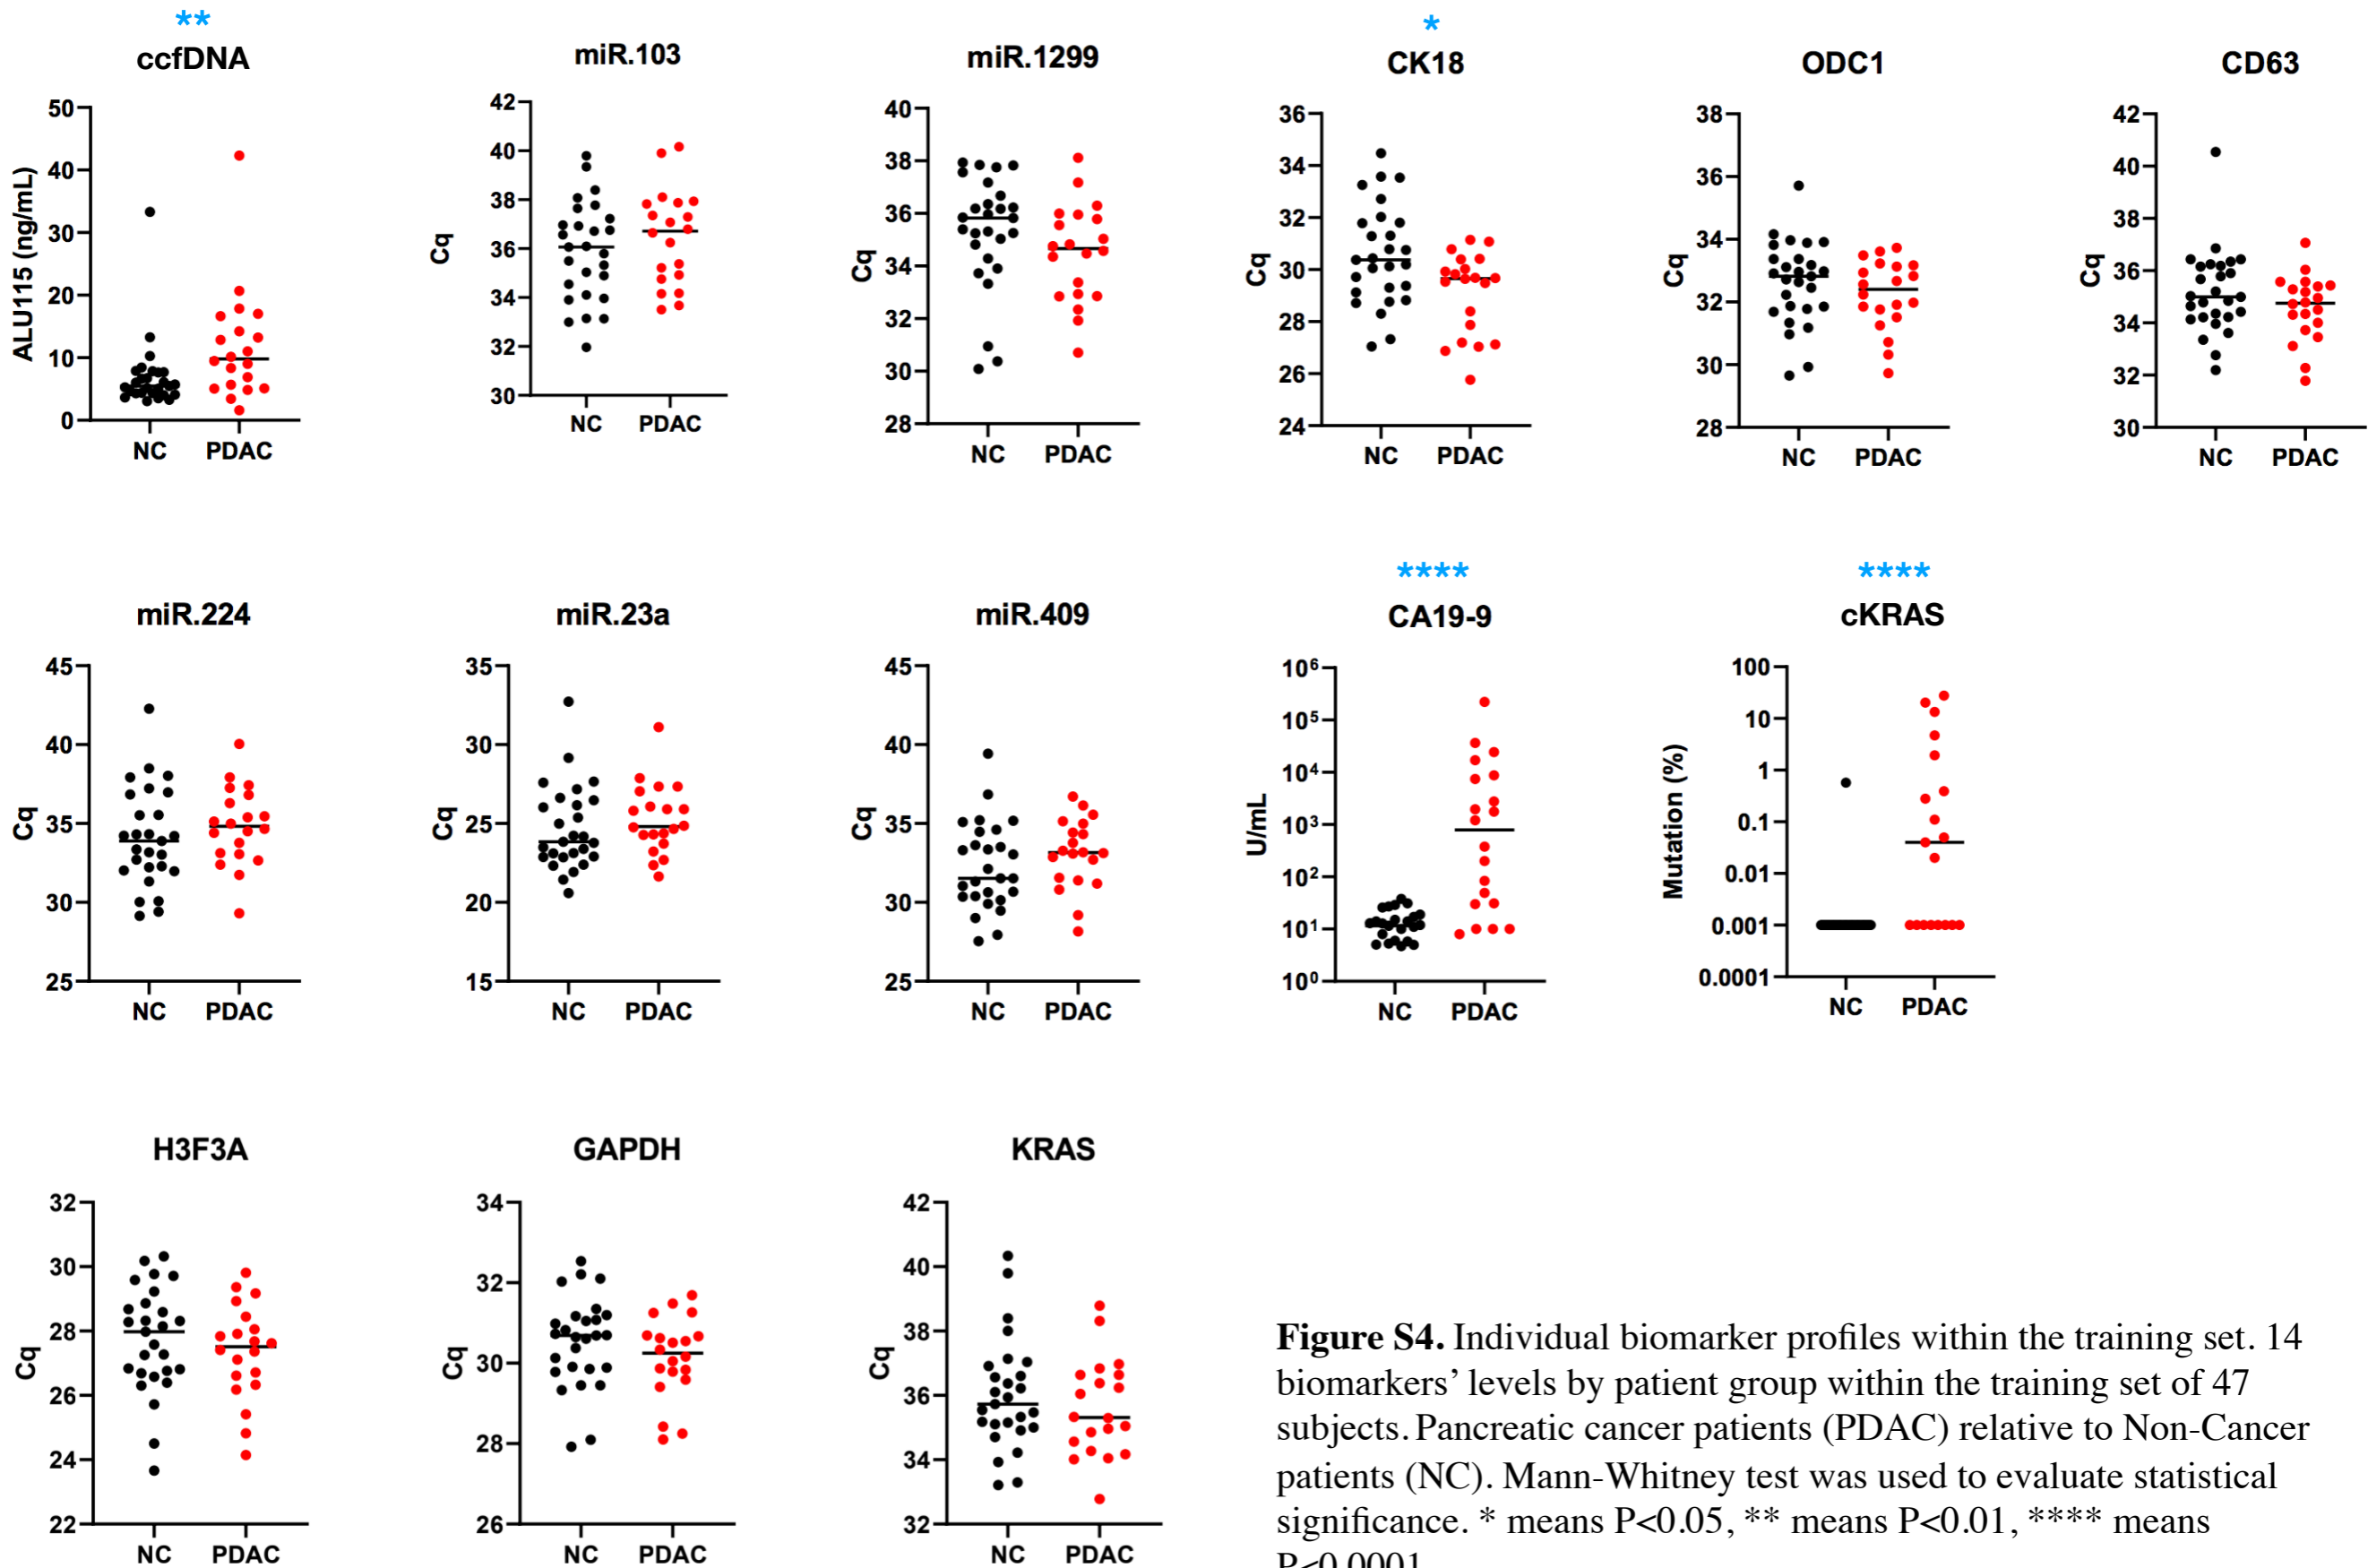

**Figure S4.** Individual biomarker profiles within the training set. 14 biomarkers' levels by patient group within the training set of 47 subjects. Pancreatic cancer patients (PDAC) relative to Non-Cancer patients (NC). Mann-Whitney test was used to evaluate statistical significance. \* means  $P < 0.05$ , \*\* means  $P < 0.01$ , \*\*\*\* means  $P < 0.0001$ .
