# Supplementary material
Source: PubMed Central journal article supplement (PMC7334066)
Supplement: NIHMS1582582-supplement-5.pdf [file NIHMS1582582-supplement-5.pdf]

**Figure S5**

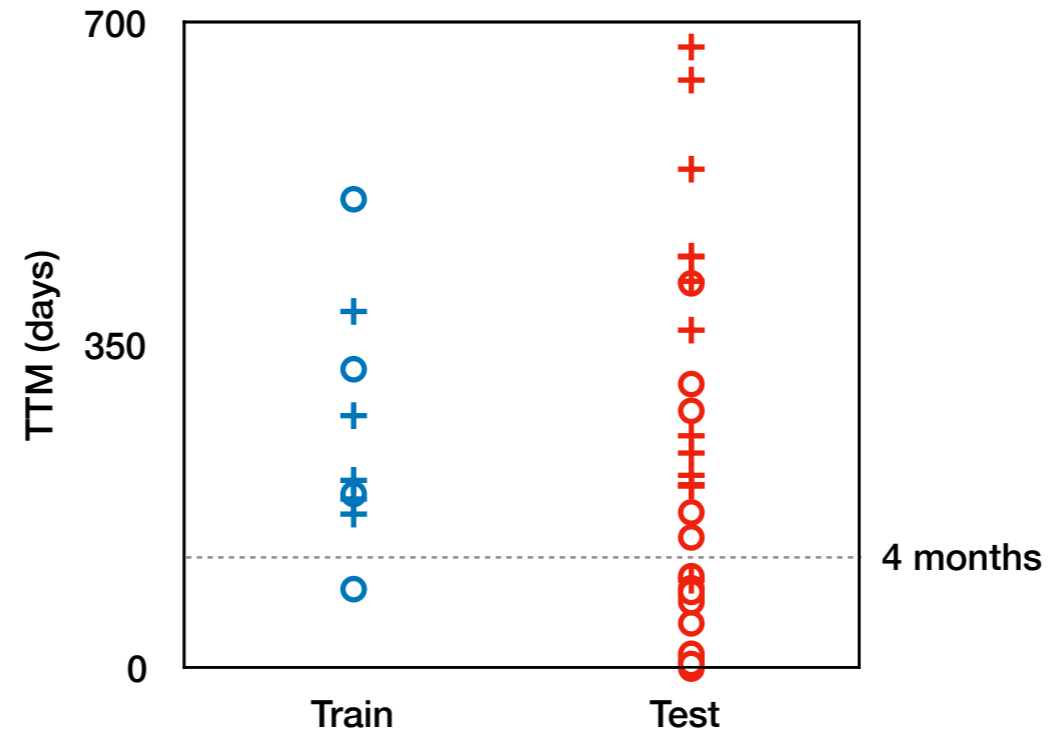

**Figure S5.** Distribution of time to metastasis (TTM) for clinical M0 PDAC patients within our training and test sets. Cross indicates no metastasis observed yet
